# Supplementary material
Source: publisher figshare collection journal article supplement (https://sage.figshare.com/ndownloader/files/12371042)
Supplement: Supplementary file 1 [file 12371042]

**Supplementary Table 1.** Overview of MBSR curriculum.

| <b>MBSR<br/>CLASS</b> | <b>THEME</b>                                                 | <b>EXERCISES</b>                                     |
|-----------------------|--------------------------------------------------------------|------------------------------------------------------|
| 1                     | <i>What is mindfulness?</i>                                  | Mindful breathing and body scan                      |
| 2                     | <i>Perception and creative responding</i>                    | Mindful breathing and body scan                      |
| 3                     | <i>Breathing through the pleasant and unpleasant</i>         | Mindful movement (gentle yoga) and mindful breathing |
| 4                     | <i>Stress and coping mechanisms</i>                          | Sitting meditation                                   |
| 5                     | <i>Responding versus reacting to stress</i>                  | Sitting meditation and loving kindness meditation    |
| 6                     | <i>Interpersonal relations</i>                               | Sitting meditation and push pull exercise            |
| Retreat               | <i>Tying it all together with loving kindness meditation</i> | Walking meditation                                   |
| 7                     | <i>Mindful eating</i>                                        | Sitting meditation                                   |
| 8                     | <i>Life, review and bringing it home</i>                     |                                                      |
